# Supplementary material for: Real-Time Mental Health Crisis Response in the United States to COVID-19
Source: Atypon-hosted journal article supplement (doi:10.1027/0227-5910/a000826), 2021-10-22
Supplement: 0227-5910_a000826_esm1.pdf [file 0227-5910_a000826_esm1.pdf]

**Electronic Supplementary Material 1**

Table E1: The difference in crisis conversations between 2019 and 2020. Overall from March 13, 2020, to July 20, 2020, 715,907 crisis conversations were exchanged in the US. In comparison, in 2019, for the same time period, 526,108 crisis conversations were exchanged. The largest increases in crisis tags were for Stress/Anxiety (35.3%), Bereavement (32.3%), and Isolation (32%). Surprisingly text volume for suicidal (4.2%) and bullying (-7.1%) exhibited a general decline or non-significant increases than other crisis tags during the pandemic period (Figure 1). All crisis tags were significantly different ( $\alpha = 0.05$ ). In fact, the number of new CTL users peaked in March of 2020 for stress and anxiety ( $n=12372$ ), a 55% increase from new users seeking help for stress and anxiety in March of 2019 ( $n=6872$ ).

| <b>Crisis Tags</b> | <b>2020</b> | <b>2019</b> | <b>% Increase</b> |
|--------------------|-------------|-------------|-------------------|
| Substance Abuse    | 8160        | 5832        | 28.5%*            |
| Depressed          | 120569      | 103010      | 14.6%*            |
| Suicidal thoughts  | 75358       | 72220       | 4.2%*             |
| Self-harm          | 40300       | 29813       | 26.0%*            |
| Stress/anxiety     | 127571      | 82515       | 35.3%*            |
| Relationship Issue | 117861      | 97719       | 17.1%*            |
| Bereavement        | 15716       | 10634       | 32.3%*            |
| Bully              | 6509        | 6973        | -7.1%**           |

|                       |       |       |         |
|-----------------------|-------|-------|---------|
| Isolated              | 77831 | 52928 | 32.0%*  |
| Eating                | 12278 | 8061  | 34.3%*  |
| Abuse                 | 23800 | 16802 | 29.4%*  |
| LGBTQ                 | 5900  | 4757  | 19.4%*  |
| 3 <sup>rd</sup> party | 10872 | 8487  | 21.9%*  |
| Other                 | 23511 | 18246 | 22.4%*  |
| Prank                 | 1765  | 1120  | 36.5%*  |
| Testing               | 4840  | 3560  | 26.4%*  |
| COVID-19              | 40122 | 0     | 100.0%* |
| Mandatory report      | 236   | 116   | 50.8%*  |
| Active Rescue         | 2708  | 3315  | -22.4%* |

\*<0.01

\*\*<0.05

Table E2: Jaccard Similarity Index of each risk tag was used to visualize the co-occurrence (i.e., the extent of overlap) of mental health concerns (Gower and Legendre 1986). The Jaccard coefficient is the fraction of the number of times two binary variables appear together divided by the total number of occurrences of both and are summarized below. Prominent Jaccard Indices (JI) include feelings of depression with isolation (JI: 0.398), relationship issues (JI: 0.427), stress and anxiety (JI: 0.433), and suicidal thoughts (JI: 0.422). It is also worthwhile to note that feelings of isolation had high co-occurrence with relationship issues (JI: 0.377), self-harm (JI: 0.233), stress and anxiety (JI: 0.335), and suicidal thoughts (JI: 0.33)

|                    | Abuse | Active Rescue | Bereavement | Bully | Depressed | Imminent Risk | Isolated | LGBTQ | Relationship | Self Harm | Stress and Anxiety | Substance |
|--------------------|-------|---------------|-------------|-------|-----------|---------------|----------|-------|--------------|-----------|--------------------|-----------|
| Active Rescue      | 0.034 |               |             |       |           |               |          |       |              |           |                    |           |
| Bereavement        | 0.081 | 0.027         |             |       |           |               |          |       |              |           |                    |           |
| Bully              | 0.113 | 0.036         | 0.067       |       |           |               |          |       |              |           |                    |           |
| Depressed          | 0.145 | 0.021         | 0.092       | 0.088 |           |               |          |       |              |           |                    |           |
| Imminent Risk      | 0.084 | 0.118         | 0.064       | 0.082 | 0.067     |               |          |       |              |           |                    |           |
| Isolated           | 0.152 | 0.026         | 0.101       | 0.106 | 0.398     | 0.080         |          |       |              |           |                    |           |
| LGBTQ              | 0.072 | 0.027         | 0.045       | 0.082 | 0.062     | 0.064         | 0.073    |       |              |           |                    |           |
| Relationship       | 0.163 | 0.020         | 0.087       | 0.091 | 0.427     | 0.065         | 0.377    | 0.070 |              |           |                    |           |
| Self Harm          | 0.152 | 0.038         | 0.085       | 0.107 | 0.258     | 0.104         | 0.233    | 0.084 | 0.228        |           |                    |           |
| Stress and Anxiety | 0.147 | 0.019         | 0.080       | 0.085 | 0.433     | 0.059         | 0.335    | 0.066 | 0.402        | 0.236     |                    |           |
| Substance          | 0.063 | 0.054         | 0.051       | 0.036 | 0.044     | 0.069         | 0.050    | 0.038 | 0.043        | 0.059     | 0.043              |           |
| Suicidal thoughts  | 0.161 | 0.035         | 0.092       | 0.105 | 0.422     | 0.118         | 0.330    | 0.075 | 0.339        | 0.301     | 0.326              | 0.053     |

Table E3: Results show the Relative Risk (RR) and 95% Confidence Interval for each mental health concern for the ‘stay at home’ compared to the ‘reopening’ phase of the pandemic.

|                     | Stress & Anxiety |                 | Depression   |                 | Self-harm    |                 | Suicidal Thoughts |                 | Substance Abuse |                 |
|---------------------|------------------|-----------------|--------------|-----------------|--------------|-----------------|-------------------|-----------------|-----------------|-----------------|
|                     | RR               | <i>p</i> -value | RR           | <i>p</i> -value | RR           | <i>p</i> -value | RR                | <i>p</i> -value | RR              | <i>p</i> -value |
|                     | (95%CI)          |                 | (95%CI)      |                 | (95%CI)      |                 | (95%CI)           |                 | (95%CI)         |                 |
| <i>Stay-at-home</i> | 1.01             | 0.29            | 0.98         | <.008           | 1.1          | <.0001          | 1.06              | <.0001          | 1.07            | 0.2             |
|                     | (0.99, 1.03)     |                 | (0.96, 0.99) |                 | (1.06, 1.14) |                 | (1.03, 1.09)      |                 | (0.97, 1.17)    |                 |
| <i>Reopening</i>    | 1                | (ref)           | 1            | (ref)           | 1            | (ref)           | 1                 | (ref)           | 1               | (ref)           |

Stay-at-home period: March 13 to May 13, 2020, Reopening period: May 14 to July 20, 2020

Table E3:continued.

|                     | Bereavement  |                 | Isolation    |                 | Bullying     |                 | Abuse        |                 | Relationships |                 |
|---------------------|--------------|-----------------|--------------|-----------------|--------------|-----------------|--------------|-----------------|---------------|-----------------|
|                     | RR           | <i>p</i> -value | RR            | <i>p</i> -value |
|                     | (95%CI)      |                 | (95%CI)      |                 | (95%CI)      |                 | (95%CI)      |                 | (95%CI)       |                 |
| <i>Stay-at-home</i> | 0.8          | <.0001          | 0.93         | <.0001          | 0.95         | 0.28            | 1.06         | 0.04            | 1.1           | <.0001          |
|                     | (0.74, 0.85) |                 | (0.91, 0.95) |                 | (0.86, 1.04) |                 | (1.00, 1.11) |                 | (1.06, 1.14)  |                 |
| <i>Reopening</i>    | 1            | (ref)           | 1            | (ref)           | 1            | (ref)           | 1            | (ref)           | 1             | (ref)           |

Stay-at-home period: March 13 to May 13, 2020, Reopening period: May 14 to July 20, 2020

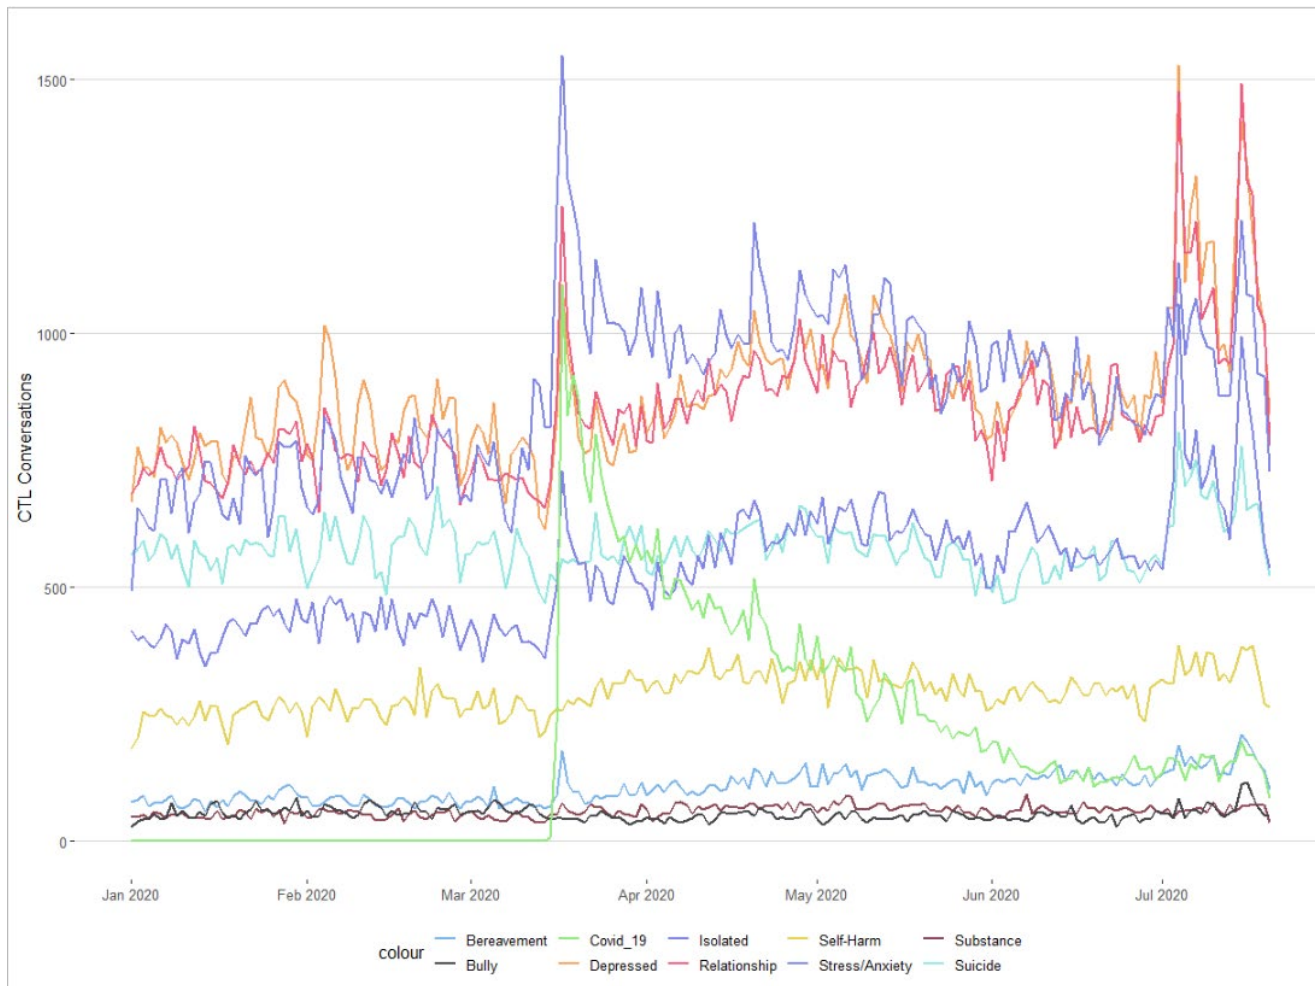

**Figure E1: Time-series of Crisis Tags from January 1, 2020, to July 20, 2020**
